# Supplementary material
Source: MDPI journal article supplement (https://www.mdpi.com/search?q=atmosphere-08-00225)
Supplement: s001 [file atmosphere-08-00225-s001.pdf]

**Supplementary Materials**
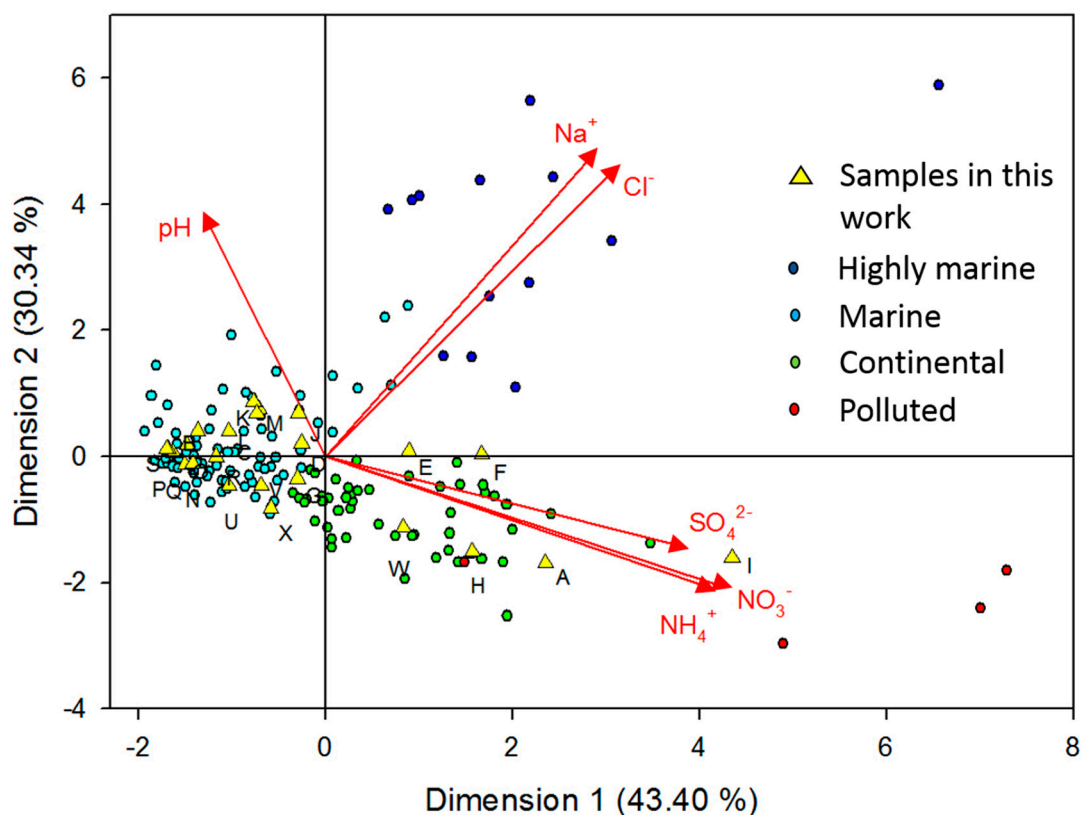

**Figure S1.** Bi-plot resulting from the PCA (PCA1) and detailing: with circles, the scores of the samples of the puy de Dôme database (highly marine are represented in blue, marine in light blue, continental in green and polluted in red); with triangles, the scores of the samples presented in this work (yellow with labels); with the red vectors, the loadings of the six experimental variables pH, Cl<sup>-</sup>, NO<sub>3</sub><sup>-</sup>, SO<sub>4</sub><sup>2-</sup>, Na<sup>+</sup> & NH<sub>4</sub><sup>+</sup>; PCA is performed using μM unit concentrations and automatic normalization of the data.

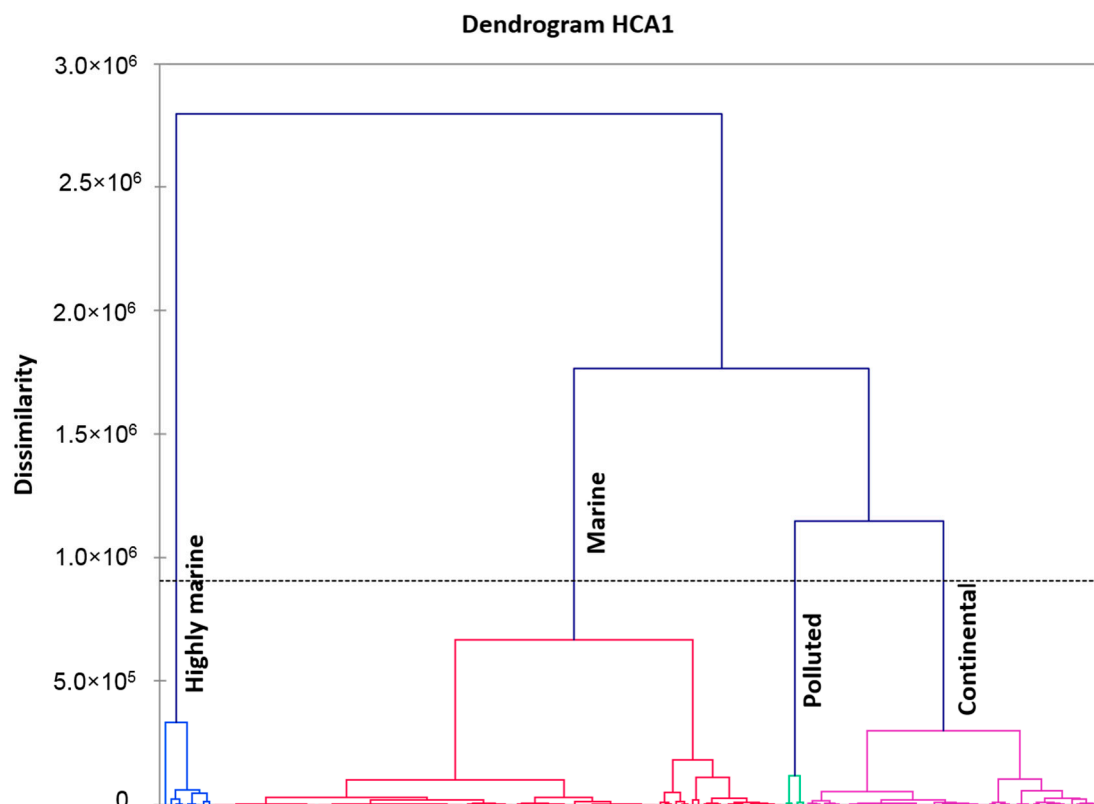

Figure S2. Dendrogram of hierarchic cluster analysis performed on the same dataset of PCA1.

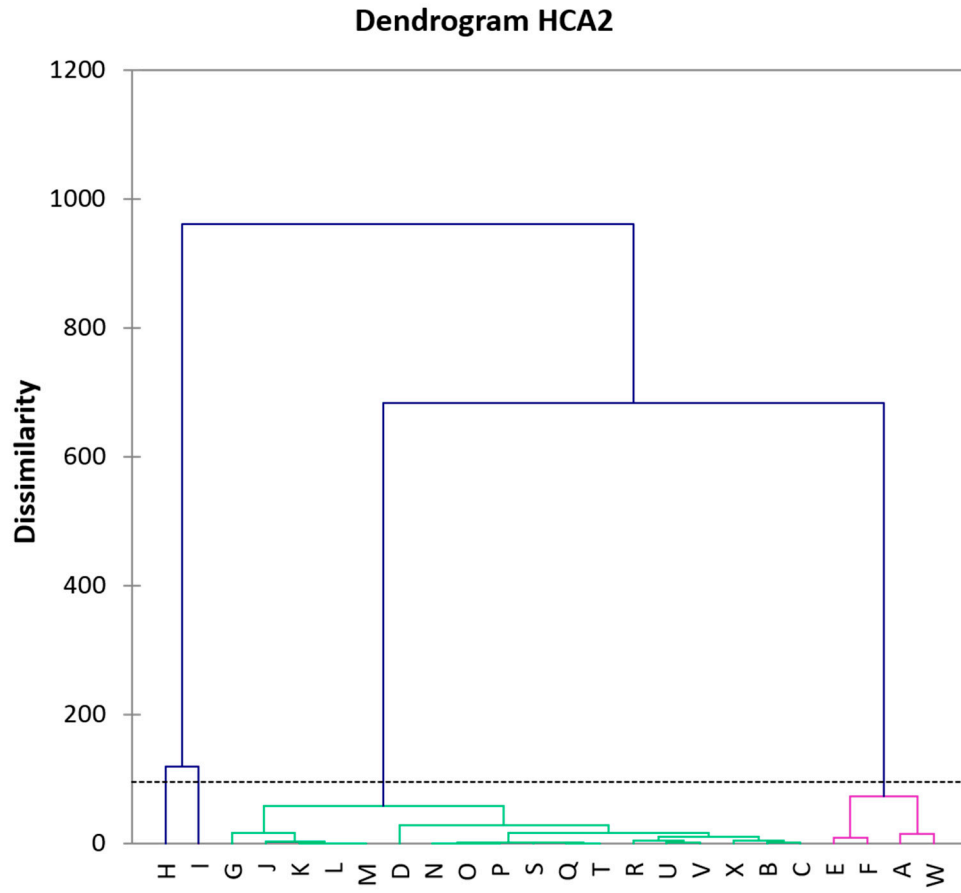

Figure S3. Dendrogram of hierarchic cluster analysis performed on the same dataset of PCA2.

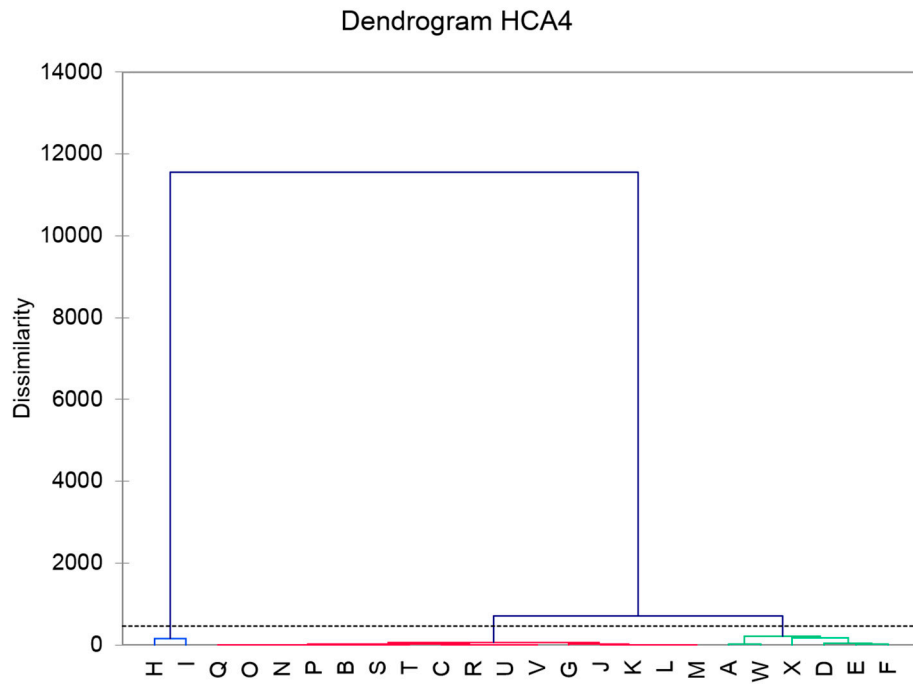

Figure S4. Dendrogram of hierarchic cluster analysis performed on the same dataset of PCA4.

**Table S1.** Minimum (Min), first quartile (1st Qu), median, mean, third quartile (3rd Qu) and maximum (Max) values for metal concentration of samples considered in this work. Concentrations are reported in  $\mu\text{g L}^{-1}$  for all trace elements except  $\text{Mg}^{2+}$ , reported in  $\text{mg L}^{-1}$ . BLQ: below quantification limit.

| Element | Min. | 1st Qu. | Median | Mean  | 3rd Qu. | Max.   | LQ     | Blank |
|---------|------|---------|--------|-------|---------|--------|--------|-------|
| As      | 0.00 | 0.00    | 0.09   | 0.10  | 0.15    | 0.42   | 0.0194 | BLQ   |
| Cd      | 0.07 | 0.14    | 0.20   | 0.25  | 0.30    | 0.81   | 0.0153 | BLQ   |
| Co      | 0.00 | 0.00    | 0.00   | 0.02  | 0.02    | 0.17   | 0.0140 | BLQ   |
| Cu      | 0.00 | 1.65    | 5.04   | 10.20 | 8.75    | 55.70  | 1.1094 | 2.64  |
| Fe      | 0.00 | 0.00    | 0.00   | 4.48  | 0.00    | 54.93  | 1.4154 | 0.80  |
| Mg *    | 0.00 | 0.04    | 0.08   | 0.16  | 0.17    | 1.32   | 1.5426 | 0.008 |
| Mn      | 0.00 | 0.00    | 0.00   | 1.06  | 0.75    | 9.10   | 0.2963 | 1.90  |
| Pb      | 0.00 | 0.00    | 0.00   | 0.32  | 0.10    | 2.63   | 0.1360 | BLQ   |
| Rb      | 0.00 | 0.19    | 0.36   | 0.40  | 0.61    | 1.06   | 0.0350 | BLQ   |
| Sb      | 0.02 | 0.06    | 0.09   | 0.14  | 0.24    | 0.42   | 0.0120 | 0.03  |
| Sr      | 0.34 | 0.69    | 1.07   | 1.58  | 1.57    | 6.15   | 0.1740 | 0.33  |
| Ti      | 0.00 | 0.00    | 1.68   | 2.89  | 4.20    | 12.89  | 0.4480 | BLQ   |
| Tl      | 0.00 | 0.00    | 0.00   | 0.01  | 0.01    | 0.02   | 0.0011 | BLQ   |
| U       | 0.00 | 0.00    | 0.00   | 0.01  | 0.01    | 0.11   | 0.0033 | BLQ   |
| V       | 0.04 | 0.14    | 0.22   | 0.82  | 0.48    | 3.87   | 0.0153 | BLQ   |
| Zn      | 3.32 | 26.01   | 55.91  | 57.49 | 78.22   | 130.40 | 4.2293 | 7.3   |

**Table S2.** Physico-chemical parameters of sampled clouds.  $\text{SO}_4^{2-}$ ,  $\text{NO}_3^-$ ,  $\text{Cl}^-$ ,  $\text{Na}^+$ ,  $\text{NH}_4^+$  and  $\text{Mg}^{2+}$  are reported in  $\text{mg L}^{-1}$ ; trace metal concentrations are reported in  $\mu\text{g L}^{-1}$ .

| Sample | Date       | Start | Stop  | Class       | pH   | $\text{SO}_4^{2-}$ | $\text{NO}_3^-$ | $\text{Cl}^-$ | $\text{Na}^+$ | $\text{NH}_4^+$ | As   | Cd   | Co   | Cu    | Fe    | Mg   | Mn   | Pb   | Rb   | Sb   | Sr   | Ti    | Tl   | U    | V    | Zn     |
|--------|------------|-------|-------|-------------|------|--------------------|-----------------|---------------|---------------|-----------------|------|------|------|-------|-------|------|------|------|------|------|------|-------|------|------|------|--------|
| A      | 26/03/2014 | 7h40  | 9h10  | Continental | 5.48 | 5.42               | 13.62           | 0.88          | 0.21          | 4.54            | 0.40 | 0.20 | 0.04 | 4.25  | 0.00  | 0.12 | 3.21 | 0.67 | 0.84 | 0.42 | 1.85 | 5.86  | 0.02 | 0.00 | 0.26 | 107.55 |
| B      | 04/04/2014 | 19h45 | 21h45 | Marine      | 6.24 | 1.3                | 1.24            | 0.68          | 0.11          | 0.71            | 0.00 | 0.22 | 0.02 | 9.79  | 0.00  | 0.04 | 0.28 | 0.00 | 0.38 | 0.06 | 0.92 | 6.86  | 0.01 | 0.00 | 0.47 | 117.82 |
| C      | 04/04/2014 | 21h45 | 00h00 | Marine      | 6.53 | 1.75               | 2.32            | 0.64          | 0.09          | 1.29            | 0.09 | 0.19 | 0.01 | 4.71  | 0.00  | 0.05 | 0.11 | 0.00 | 0.65 | 0.12 | 1.30 | 1.42  | 0.01 | 0.02 | 1.71 | 75.13  |
| D      | 05/04/2014 | 1h30  | 4h05  | Continental | 6.6  | 2.5                | 4.5             | 1.03          | 0.15          | 2.23            | 0.16 | 0.14 | 0.03 | 5.46  | 0.00  | 0.10 | 0.37 | 0.00 | 0.69 | 0.29 | 0.97 | 1.96  | 0.01 | 0.00 | 3.51 | 85.81  |
| E      | 05/04/2014 | 4h05  | 7h00  | Continental | 6.88 | 3.82               | 8.17            | 1.7           | 0.28          | 3.47            | 0.20 | 0.08 | 0.02 | 1.19  | 0.00  | 0.18 | 0.59 | 0.00 | 0.36 | 0.26 | 1.93 | 1.13  | 0.01 | 0.02 | 3.71 | 38.09  |
| F      | 05/04/2014 | 7h35  | 9h40  | Continental | 6.8  | 6.48               | 8.25            | 2.66          | 0.4           | 3.83            | 0.25 | 0.12 | 0.03 | 5.64  | 0.00  | 0.34 | 1.97 | 0.00 | 0.68 | 0.37 | 3.84 | 0.00  | 0.01 | 0.02 | 3.91 | 75.69  |
| G      | 05/11/2014 | 4h10  | 5h50  | Marine      | 4.74 | 5.58               | 1.31            | 1.24          | 1.13          | 0               | 0.11 | 0.30 | 0.03 | 29.49 | 0.00  | 0.18 | 1.10 | 1.00 | 1.07 | 0.09 | 1.89 | 2.24  | 0.00 | 0.00 | 0.34 | 107.98 |
| H      | 05/11/2014 | 7h00  | 9h10  | Marine      | 4.06 | 13.38              | 2.46            | 1.46          | 0.96          | 0.71            | 0.00 | 0.14 | 0.01 | 10.64 | 53.04 | 0.08 | 0.00 | 1.10 | 0.20 | 0.04 | 1.16 | 2.88  | 0.00 | 0.00 | 0.15 | 46.78  |
| I      | 05/11/2014 | 9h15  | 11h35 | Marine      | 4.1  | 23.75              | 4.69            | 3.43          | 2.18          | 1.51            | 0.12 | 0.82 | 0.04 | 24.20 | 55.48 | 0.38 | 2.41 | 1.80 | 0.44 | 0.09 | 6.21 | 9.02  | 0.01 | 0.11 | 0.52 | 76.73  |
| J      | 12/11/2014 | 15h15 | 17h15 | Marine      | 5.38 | 3.67               | 1.53            | 2.76          | 1.84          | 0.27            | 0.09 | 0.24 | 0.00 | 1.54  | 0.00  | 0.16 | 0.00 | 0.00 | 0.27 | 0.10 | 1.00 | 5.94  | 0.00 | 0.00 | 0.22 | 66.16  |
| K      | 12/11/2014 | 17h20 | 19h15 | Marine      | 5.51 | 2.76               | 1.22            | 2.39          | 1.59          | 0               | 0.09 | 0.57 | 0.00 | 1.71  | 0.00  | 0.26 | 0.00 | 0.00 | 0.61 | 0.23 | 1.49 | 0.00  | 0.01 | 0.00 | 0.22 | 131.70 |
| L      | 12/11/2014 | 19h30 | 21h35 | Marine      | 5.58 | 2.32               | 1.28            | 2.41          | 1.7           | 0               | 0.14 | 0.52 | 0.00 | 0.00  | 0.00  | 0.16 | 0.00 | 0.00 | 0.37 | 0.07 | 1.26 | 3.70  | 0.00 | 0.00 | 0.15 | 107.94 |
| M      | 12/11/2014 | 21h35 | 00h00 | Marine      | 5.35 | 2.25               | 1.32            | 2.26          | 1.76          | 0               | 0.00 | 0.35 | 0.00 | 7.94  | 0.00  | 0.11 | 0.00 | 0.00 | 0.11 | 0.02 | 1.46 | 3.68  | 0.00 | 0.00 | 0.08 | 44.39  |
| N      | 14/11/2014 | 16h45 | 18h50 | Marine      | 5.51 | 1.08               | 0.38            | 0.21          | 0.34          | 0               | 0.00 | 0.20 | 0.00 | 1.85  | 0.00  | 0.01 | 0.00 | 0.00 | 0.00 | 0.02 | 0.81 | 0.00  | 0.00 | 0.00 | 0.12 | 67.77  |
| O      | 17/11/2014 | 15h30 | 18h25 | Marine      | 5.63 | 0.84               | 0.64            | 0.16          | 0.29          | 0               | 0.00 | 0.12 | 0.00 | 3.47  | 0.00  | 0.02 | 0.64 | 0.00 | 0.32 | 0.34 | 0.68 | 3.48  | 0.00 | 0.00 | 0.07 | 27.58  |
| P      | 17/11/2014 | 18h25 | 21h20 | Marine      | 5.7  | 0.77               | 0.94            | 0.07          | 0.24          | 0               | 0.00 | 0.31 | 0.00 | 0.03  | 0.00  | 0.00 | 0.00 | 0.00 | 0.09 | 0.08 | 0.86 | 0.77  | 0.00 | 0.01 | 0.04 | 14.36  |
| Q      | 17/11/2014 | 21h20 | 00h00 | Marine      | 5.33 | 1.05               | 1.26            | 0.19          | 0.31          | 0               | 0.08 | 0.51 | 0.00 | 6.50  | 0.00  | 0.03 | 0.00 | 0.00 | 0.16 | 0.07 | 0.34 | 0.00  | 0.00 | 0.00 | 0.08 | 22.33  |
| R      | 18/11/2014 | 6h05  | 8h10  | Marine      | 5.44 | 2.71               | 1.15            | 0.58          | 0.5           | 0               | 0.07 | 0.27 | 0.00 | 4.50  | 0.00  | 0.04 | 0.00 | 0.00 | 0.11 | 0.10 | 0.41 | 0.00  | 0.00 | 0.00 | 0.24 | 39.32  |
| S      | 18/11/2014 | 17h10 | 19h10 | Marine      | 5.7  | 1.58               | 0.84            | 0.42          | 0.4           | 0.04            | 0.00 | 0.07 | 0.01 | 0.95  | 0.00  | 0.02 | 0.00 | 0.00 | 0.23 | 0.04 | 0.71 | 0.00  | 0.00 | 0.01 | 0.14 | 3.74   |
| T      | 18/11/2014 | 19h20 | 21h15 | Marine      | 5.32 | 1.35               | 1.29            | 0.26          | 0.4           | 0               | 0.00 | 0.07 | 0.00 | 0.00  | 0.00  | 0.02 | 0.00 | 0.00 | 0.05 | 0.02 | 1.39 | 13.02 | 0.00 | 0.01 | 0.19 | 3.35   |
| U      | 18/11/2014 | 21h20 | 23h30 | Marine      | 4.85 | 1.92               | 2.43            | 0.63          | 0.39          | 0               | 0.07 | 0.17 | 0.00 | 8.51  | 0.00  | 0.04 | 0.00 | 0.00 | 0.28 | 0.06 | 0.63 | 6.07  | 0.00 | 0.00 | 0.13 | 34.68  |
| V      | 19/11/2014 | 00h00 | 2h00  | Marine      | 4.63 | 2.56               | 2.88            | 1.28          | 0.62          | 0               | 0.00 | 0.15 | 0.00 | 7.35  | 0.00  | 0.07 | 0.00 | 0.41 | 0.37 | 0.06 | 0.47 | 0.00  | 0.00 | 0.00 | 0.18 | 10.43  |
| W      | 16/02/2016 | 10h50 | 14h20 | Continental | 5.6  | 2.59               | 13.89           | 0.28          | 0.16          | 2.04            | 0.18 | 0.14 | 0.00 | 51.16 | 0.00  | 0.06 | 5.82 | 2.66 | 0.35 | 0.13 | 0.55 | 0.64  | 0.02 | 0.00 | 0.21 | 20.32  |
| X      | 05/06/2016 | 20h45 | 23h36 | Continental | 5.1  | 1.62               | 2.62            | 0.12          | 0.07          | 1.77            | 0.42 | 0.24 | 0.17 | 56.26 | 0.00  | 1.33 | 9.19 | 0.00 | 1.02 | 0.32 | 6.11 | 1.30  | 0.02 | 0.01 | 3.20 | 67.84  |

**Table S3.** Description of the various cloud sampling sites where trace metal concentrations were determined.

| Reference | Sampling Site   | State         | Geographical Coordinates | Altitude (m a.s.l.) | Sampling period                                          | Air Mass Origin    | Land Use                                                  |
|-----------|-----------------|---------------|--------------------------|---------------------|----------------------------------------------------------|--------------------|-----------------------------------------------------------|
| This work | Mt. puy de Dôme | France        | 45°46' N<br>2°58' E      | 1465                | March, April and November 2014<br>February and June 2016 | Marine/Continental | Grassland, forest, agriculture                            |
| [37]      | Mt. Elden       | Arizona (USA) | 35°14' N<br>111°35' E    | 2834                | Summer 2005 – 2007                                       | Continental        | “Coconino national forest”                                |
| [15]      | Vallombrosa     | Italy         | 43°73' N<br>11°55' E     | 950                 | November 1992 – March 1995                               | Marine/Polluted    | “Riserva statale Vallombrosa” protected forest            |
| [17]      | Kala Bagh       | Pakistan      | 34°3' N<br>73°2' E       | 2400                | 19–28 July 1996                                          | Continental        | Mountainous treed region                                  |
| [14]      | Mt. Schmücke    | Germany       | 50°39' N<br>10°47' E     | 605                 | January 2001–December 2003                               | Continental        | Thuringian forest                                         |
| [16]      | Mt. Lu          | China         | 29°35' N<br>115°59' E    | 1165                | 27 August–9 September, 2011                              | Polluted           | Large, non-ferrous industries and coal-fired power plants |
| [38]      | Mt. Tai         | China         | 36°16' N<br>117°06' E    | 1543                | 20 March–20 April, 2007<br>15 October–15 November 2008   | Polluted           | Steel industries and mining activities                    |
| [6]       | Mt. Brocken     | Germany       | 51°80' N<br>10°67' E     | 1141                | May–June 1997<br>October 1997                            | Continental        | Grassland, forest, agriculture                            |

**Table S4.** Correlation matrix obtained by the PCA3 analysis considering the concentration of  $\text{Cl}^-$ ,  $\text{NO}_3^-$ ,  $\text{SO}_4^{2-}$ ,  $\text{Na}^+$  and  $\text{NH}_4^+$  and the total metal concentration. The color code depicts in blue values between 0 and 0.2, in light blue values between 0.2 and 0.4, in light orange values between 0.4 and 0.6, in orange values between 0.6 and 0.8 and in dark orange values between 0.8 and 1.

| Variables          | $\text{SO}_4^{2-}$ | $\text{NO}_3^-$ | $\text{Cl}^-$ | $\text{Na}^+$ | $\text{NH}_4^+$ | Metal    | pH       |
|--------------------|--------------------|-----------------|---------------|---------------|-----------------|----------|----------|
| $\text{SO}_4^{2-}$ | <b>1</b>           | 0.21            | 0.60          | 0.52          | 0.25            | 0.24     | -0.50    |
| $\text{NO}_3^-$    | 0.21               | <b>1</b>        | 0.09          | -0.24         | 0.85            | 0.10     | 0.22     |
| $\text{Cl}^-$      | 0.60               | 0.09            | <b>1</b>      | 0.83          | 0.18            | 0.19     | -0.11    |
| $\text{Na}^+$      | 0.52               | -0.24           | 0.83          | <b>1</b>      | -0.30           | 0.10     | -0.47    |
| $\text{NH}_4^+$    | 0.25               | 0.85            | 0.18          | -0.30         | <b>1</b>        | 0.31     | 0.44     |
| Metal              | 0.24               | 0.10            | 0.19          | 0.10          | 0.31            | <b>1</b> | -0.14    |
| pH                 | -0.50              | 0.22            | -0.11         | -0.47         | 0.44            | -0.14    | <b>1</b> |
